# Supplementary material
Source: publisher figshare collection journal article supplement (https://frontiersin.figshare.com/ndownloader/files/28408392)
Supplement: Supplementary file 1 [file 28408392]

**DNA metabarcoding of macrobenthic communities in the North Sea was most comparable with morphology based analyses when using the Leray primer set**

There is considerable support for the use of the mitochondrial COI gene to assess metazoan diversity from bulk samples (Leray and Knowlton, 2015;Lobo et al., 2017;Andujar et al., 2018), yet finding the best primer set for a specific target group and study requires empirical data rather than relying on general rule of thumbs (Alberdi et al., 2018). In a study comparing the performance of five primer sets on mock communities of marine macrobenthos using the 454 sequencing platform, primer set E was amongst the best primer sets in terms of detecting many species (Hollatz et al., 2017). The amplification of the 3’ part of the Folmer region has resulted in better detection of marine macroinvertebrates than the full length Folmer fragment (Aylagas et al., 2016;Hollatz et al., 2017;Lobo et al., 2017). In silico testing showed that the primer sets in the 3’ region generally detected almost twice the number of species compared to the primer set in the 5’ region (Table 1), which was confirmed by our wet lab results: primer sets amplifying the 3’ region outperformed primer set D in recovering macrobenthos species. Our data clearly showed that the primer sets used by Leray et al. (2013) (Primer set A) and Lobo et al. (2013) (Primer set E) outcompeted the other three primer sets in the number of high quality and non-chimeric reads (ESM Fig 1). Both primer sets amplified exactly the same fragment of the COI gene, but the reverse primer of primer set A has a higher degeneracy than the reverse primer of primer set E (Table 1). A higher degeneracy has led to a better performance of COI primers for insect communities (Marquina et al., 2019). Based on the wetlab results, primer set A outperformed primer set E at various levels: 1/ twice the number of sequences received taxonomic assignment (22.6 vs 10.9 %); 2/ the best correspondence with morphological species numbers in the different locations was obtained (ESM Fig 4), and 3/ the highest number of morphologically identified species was detected with primer set A (Fig 3). Finally, the Leray primer set was able to differentiate the four macrobenthic communities, and is therefore recommended for monitoring studies.

**References**

Alberdi, A., Aizpurua, O., Gilbert, M.T.P., and Bohmann, K. (2018). Scrutinizing key steps for reliable metabarcoding of environmental samples. *Methods in Ecology and Evolution* 9**,** 134-147.

Andujar, C., Arribas, P., Yu, D.W., Vogler, A.P., and Emerson, B.C. (2018). Why the COI barcode should be the community DNA metabarcode for the metazoa. *Molecular Ecology* 27**,** 3968-3975.

Aylagas, E., Borja, A., Irigoien, X., and Rodriguez-Ezpeleta, N. (2016). Benchmarking DNA Metabarcoding for Biodiversity-Based Monitoring and Assessment. *Frontiers in Marine Science* 3.

Hollatz, C., Leite, B.R., Lobo, J., Froufe, H., Egas, C., and Costa, F.O. (2017). Priming of a DNA metabarcoding approach for species identification and inventory in marine macrobenthic communities. *Genome* 60**,** 260-271.

Leray, M., and Knowlton, N. (2015). DNA barcoding and metabarcoding of standardized samples reveal patterns of marine benthic diversity. *Proceedings of the National Academy of Sciences of the United States of America* 112**,** 2076-2081.

Leray, M., Yang, J.Y., Meyer, C.P., Mills, S.C., Agudelo, N., Ranwez, V., Boehm, J.T., and Machida, R.J. (2013). A new versatile primer set targeting a short fragment of the mitochondrial COI region for metabarcoding metazoan diversity: application for characterizing coral reef fish gut contents. *Frontiers in Zoology* 10.

Lobo, J., Costa, P.M., Teixeira, M.a.L., Ferreira, M.S.G., Costa, M.H., and Costa, F.O. (2013). Enhanced primers for amplification of DNA barcodes from a broad range of marine metazoans. *Bmc Ecology* 13.

Lobo, J., Shokralla, S., Costa, M.H., Hajibabaei, M., and Costa, F.O. (2017). DNA metabarcoding for high-throughput monitoring of estuarine macrobenthic communities. *Scientific Reports* 7.

Marquina, D., Andersson, A.F., and Ronquist, F. (2019). New mitochondrial primers for metabarcoding of insects, designed and evaluated using in silico methods. *Molecular Ecology Resources* 19**,** 90-104.
